# Supplementary material for: Solvent-mediated gel formation, hierarchical structures, and rheological properties of organogels
Source: Royal Society of Chemistry journal article supplement (doi:10.1039/c4sm02423k), 2014-11-19
Supplement: c4sm02423k1.pdf [file c4sm02423k1.pdf]

## Supplementary information

for

### Solvent-Mediated Gel Formation, Hierarchical Structures, and Rheological Properties of Organogels

Ming-Ming Su, Hai-Kuan Yang, Li-Jun Ren, Ping Zheng, and Wei Wang

#### XRD Spectra and Peak Splitting

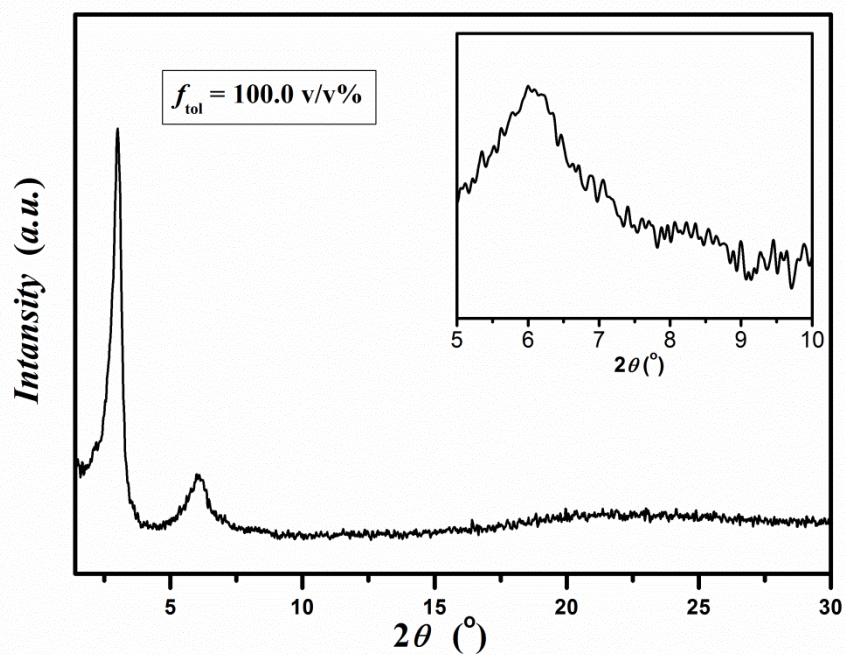

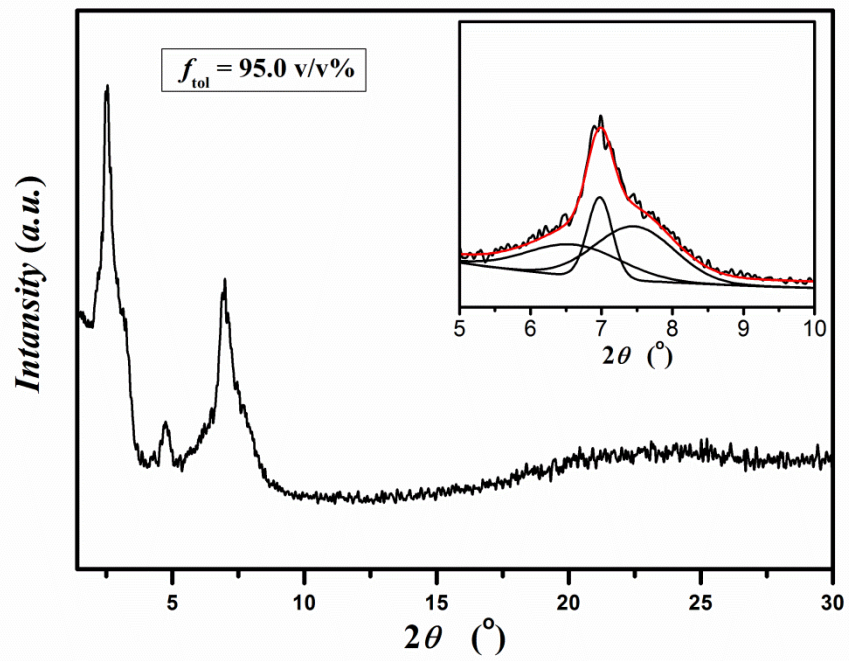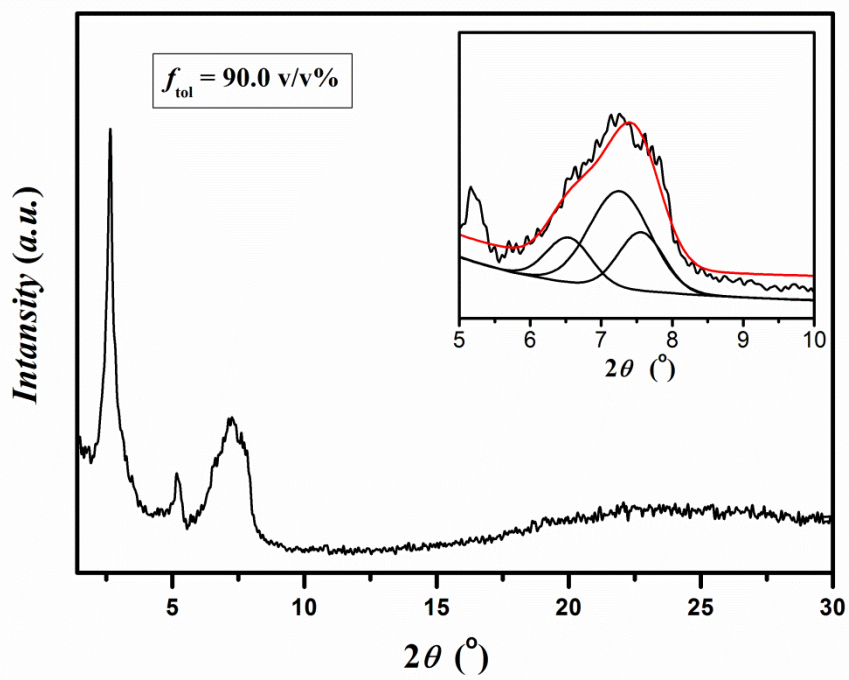

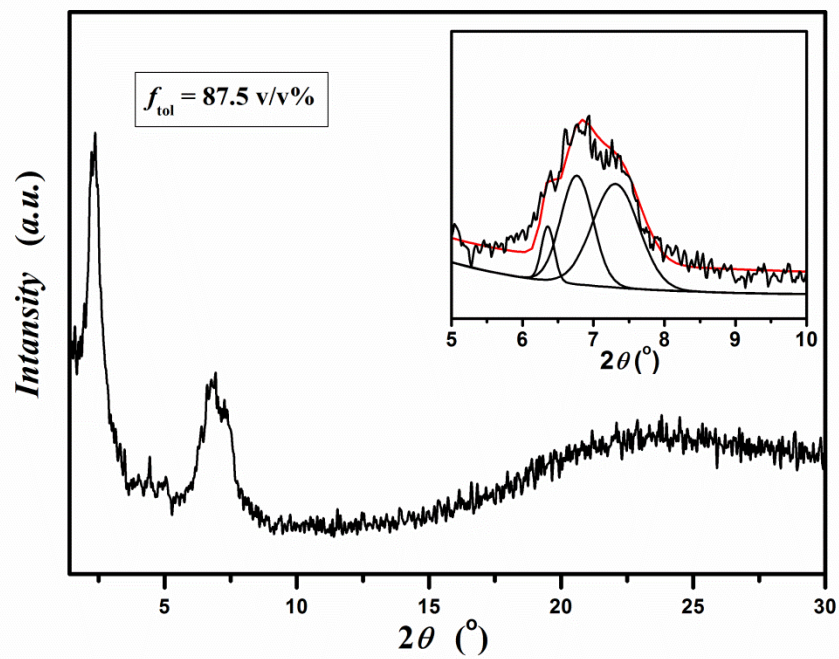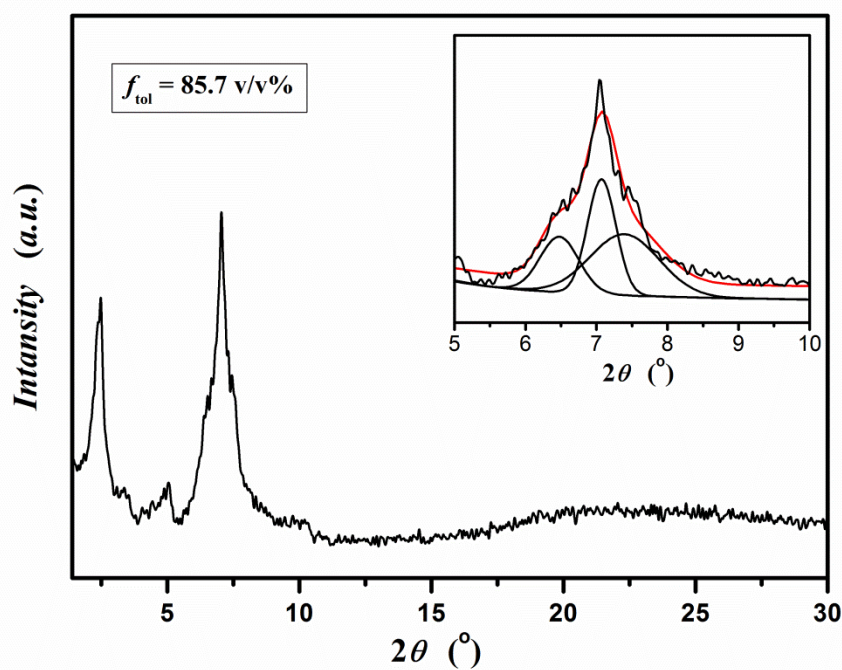

**Fig. S1** XRD patterns of the xerogel samples of the organogels at  $f_{\text{tol}} = 100.0, 95.0, 90.0, 87.5$  and  $85.7$  v/v%.
